# Supplementary material
Source: PubMed Central journal article supplement (PMC1201350)
Supplement: 7600769s1.pdf [file 7600769s1.pdf]

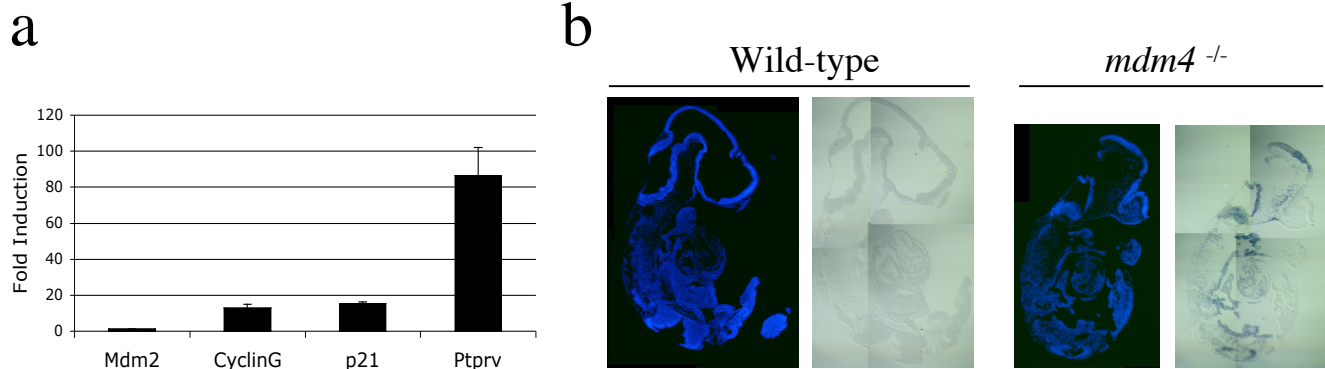

**Fig. S1 : Increased *Ptprv* expression in *mdm4*-mutant embryos.**

(a) Quantitative RT-PCR analysis using primers for murine Mdm2, cyclinG, p21 and Ptprv revealed increased mRNA levels in *mdm4*-homozygous mutant embryos compared to wild-type embryos. The data represent the means (+/- the standard deviation) of three independent experiments

(b) Non-radioactive *In Situ* hybridization on E10.5 embryo sections shows no expression of *Ptprv* in wild type and strong expression in *mdm4*-mutant embryos. *In situ* hybridization was performed on paraffin sections, using digoxigenin-labeled antisense RNA probes. The *Ptprv* antisense probe was generated using T3 and EcoRI-linearized pT7T3PAC-*Ptprv* as a template (EST AA863502, Image Consortium).
